# Supplementary material for: Quasi-two-dimensional α-molybdenum oxide thin film prepared by magnetron sputtering for neuromorphic computing
Source: Royal Society of Chemistry journal article supplement (doi:10.1039/d2ra02652j), 2022-01-01
Supplement: d2ra02652j1.pdf [file d2ra02652j1.pdf]

## Supporting Information

### Quasi-Two-Dimensional $\alpha$ -Molybdenum Oxide Thin Film Prepared by Magnetron Sputtering for Neuromorphic Computing

Zhenfa Wu,<sup>a</sup> Peng Shi,<sup>a</sup> Ruofei Xing,<sup>a</sup> Yuzhi Xing,<sup>a</sup> Yufeng Ge,<sup>a</sup> Lin Wei,<sup>\*b</sup> Dong Wang,<sup>a</sup> Le Zhao,<sup>c</sup> Shishen Yan<sup>a</sup> and Yanxue Chen<sup>\*a</sup>

<sup>a</sup>*School of Physics, and State Key Laboratory of Crystal Materials, Shandong University, Jinan 250100, China*

<sup>b</sup>*School of Microelectronics, Shandong University, Jinan 250100, China*

<sup>c</sup>*School of Electronic and Information Engineering, Qilu University of Technology, Jinan 250353, China*

\* *Corresponding author. E-mail: cyx@sdu.edu.cn (Y. X. Chen), wl2003@sdu.edu.cn (L. Wei)*

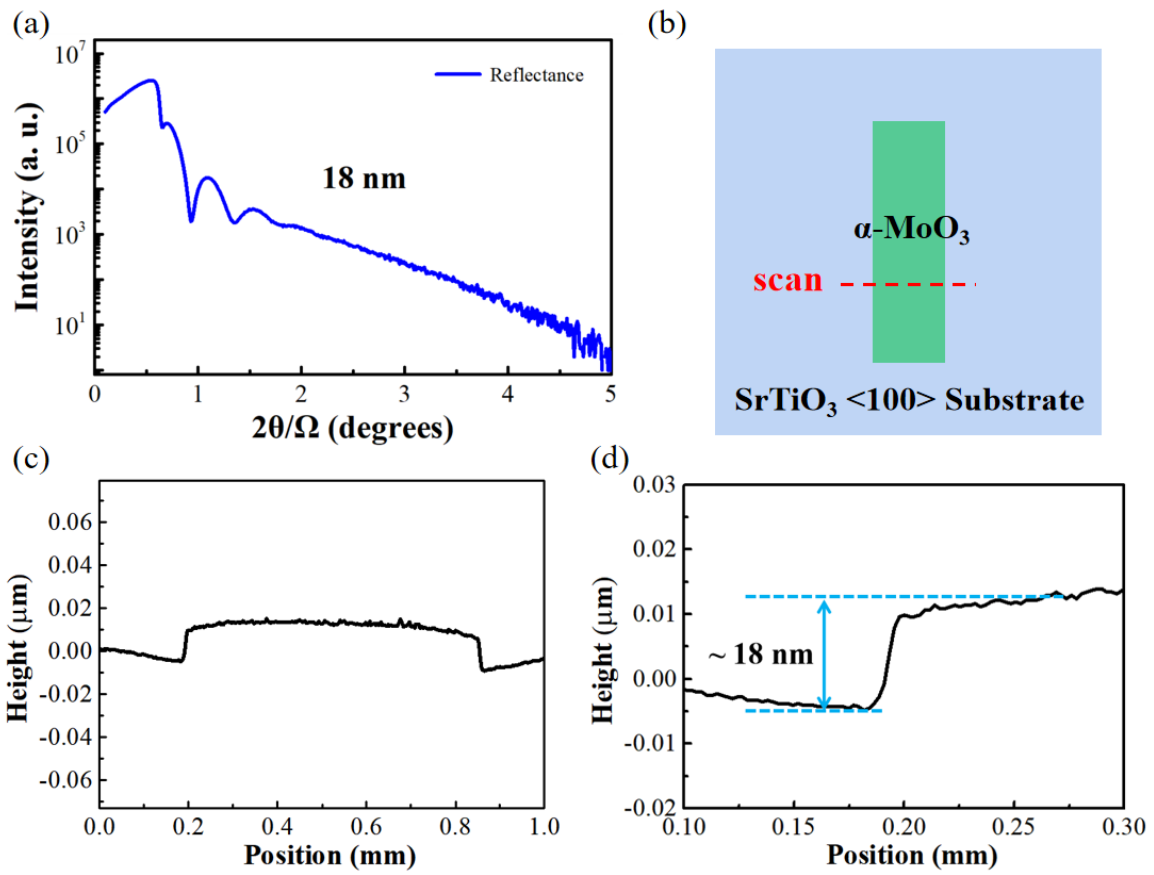

Fig. S1. The thickness characterization of  $\alpha$ - $\text{MoO}_3$  thin film. (a) The X-ray reflectance spectrum of  $\alpha$ - $\text{MoO}_3$  thin film. (b) Schematic image of the  $\alpha$ - $\text{MoO}_3$  bar grown on  $\text{SrTiO}_3$  substrate through a hard mask. (c, d) The step profiler spectrum of the  $\alpha$ - $\text{MoO}_3$  bar.
